# Supplementary material for: Cognitive Effects of Montelukast: A Pharmaco-EEG Study
Source: MDPI journal article supplement (doi:10.3390/brainsci11050547), 2021-04-27
Supplement: s1 [file s1]

## Supplementary File

**Table S1.** Results (p-values) of the cluster based permutation tests for all EEG conditions.

| Condition        | Power                      | Brain-rate | Entropy  | Hjorth A | Hjorth M | Hjorth C |
|------------------|----------------------------|------------|----------|----------|----------|----------|
| <b>Rest 1</b>    | -                          | -          | -        | -        | -        | -        |
| <b>Rest 2</b>    | -                          | -          | - 0.0459 | -        | -        | -        |
|                  | -                          | -          | - 0.0459 | -        | -        | -        |
| <b>WP learn</b>  | -                          | -          | -        | -        | -        | -        |
| <b>WP recall</b> | -                          | -          | -        | - 0.0352 | -        | -        |
| <b>VR learn</b>  | -                          | + 0.0469   | + 0.0078 | + 0.0313 | -        | -        |
|                  | -                          | -          | - 0.0078 | -        | -        | -        |
| <b>Simon C</b>   | + 0.0039 ( $\gamma$ )      | -          | -        | -        | + 0.0391 | -        |
| <b>Simon IC</b>  | - 0.0430 ( $\alpha\beta$ ) | - 0.0430   | - 0.0117 | -        | + 0.0352 | -        |
|                  | -                          | -          | -        | -        | - 0.0352 | -        |

*Notes:* Cluster based permutation tests based on the t-statistics for dependent samples were performed across BASELINE vs MONTELUKAST. Level of significance,  $p = <.05$ . Resting EEG ( $n = 10, 1024$  permutations), cognitive EEG ( $n = 8, 256$  permutations), positive cluster (+), negative cluster (-). Frequency and electrode cluster correction was performed for power, electrode cluster correction for all other measures.
